# Supplementary material for: Selective determination of trace boron based on resonance Rayleigh scattering energy transfer from nanogold aggregate to complex of boric acid–azomethine-H
Source: Royal Society of Chemistry journal article supplement (doi:10.1039/c4ay00411f), 2014-01-01
Supplement: c4ay00411f1.pdf [file c4ay00411f1.pdf]

## Selective determination of trace boron based on resonance Rayleigh scattering energy transfer from nanogold aggregate to complex of boric acid-azomethine-H

Lingling Ye<sup>a</sup>, Guiqing Wen<sup>a</sup>, Yanghe Luo<sup>a,b</sup>, Hua Deng<sup>a</sup>, Lening Hu<sup>a</sup>, Caiyan Kang<sup>a</sup>, Fanggui

Ye<sup>a</sup>, Aihui Liang<sup>\*a</sup>, Zhiliang Jiang<sup>\*a</sup>

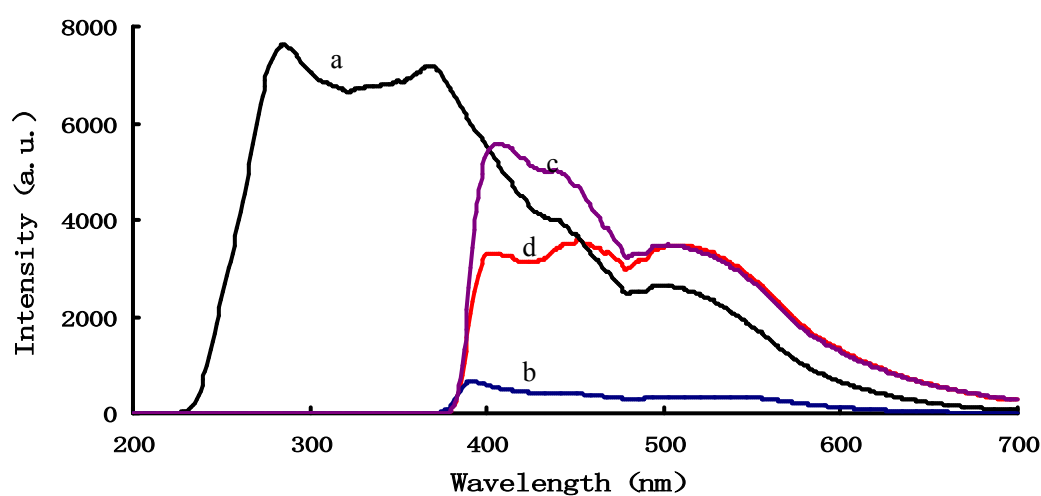

**Figure 1S RRS spectra of the AMH-AuNPs-boron system**

(a) 200 ng/ml B-0.17 $\mu$ g/ml AuNPs -pH 5.6 NH<sub>4</sub>AC-HAc; (b) 200 ng/ml B-0.17 $\mu$ g/ml AuNPs-7.5 $\times 10^{-4}$ g/ml azomethine -H; (c) pH 5.6 NH<sub>4</sub>AC-HAc -7.5 $\times 10^{-4}$ g/ml AMH -0.17 $\mu$ g/ml AuNPs; (d) pH 5.6 NH<sub>4</sub>AC-HAc -7.5 $\times 10^{-4}$ g/ml AMH-0.17 $\mu$ g/ml AuNPs-200 ng/ml B.

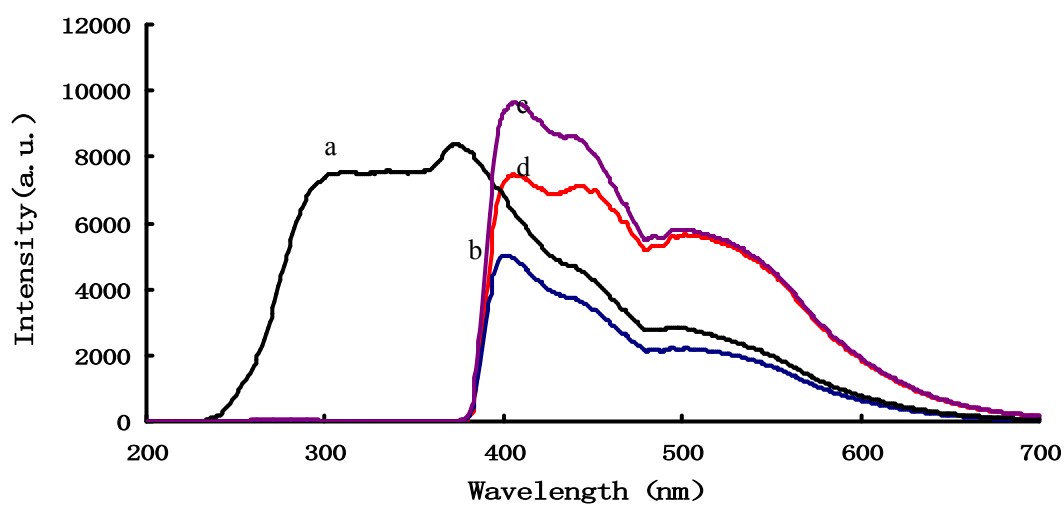

**Figure 2S RRS spectra of the AMH-HAuCl<sub>4</sub>-boron system**

(a) 200 ng/mL B-pH 5.6 NH<sub>4</sub>AC-HAc -0.375μg/ml HAuCl<sub>4</sub>; (b) 200 ng/mL B- 7.5×10<sup>-4</sup>g/ml AMH - 0.375μg/ml HAuCl<sub>4</sub>; (c) pH 5.6 NH<sub>4</sub>AC-HAc -7.5×10<sup>-4</sup>g/ml AMH -0.375μg/ml HAuCl<sub>4</sub>; (c) pH 5.6 NH<sub>4</sub>AC-HAc -7.5×10<sup>-4</sup>g/ml AMH- -0.375μg/ml HAuCl<sub>4</sub>-200 ng/mL B.

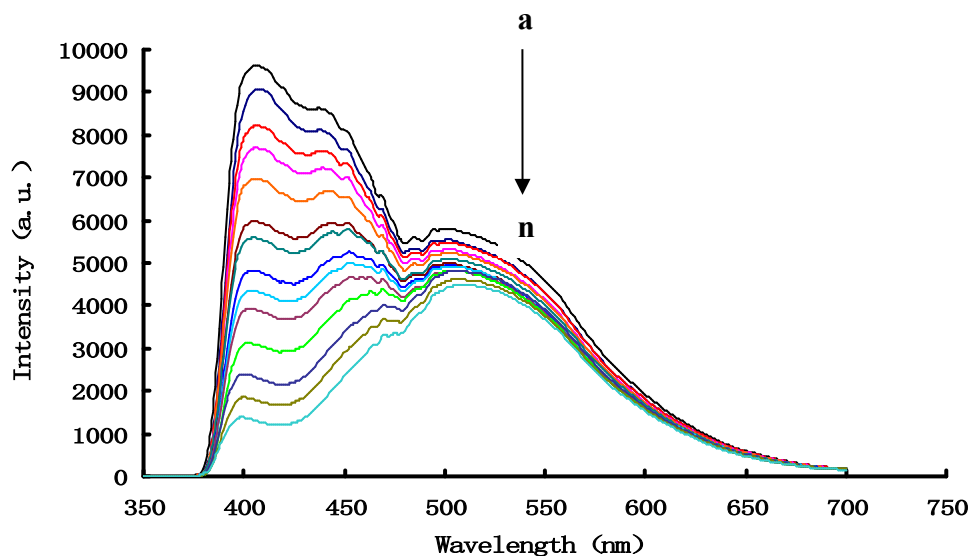

**Figure 3S RRS spectra of the B-AMH-HAuCl<sub>4</sub> system**

(a) 2.5×10<sup>-2</sup>g/ml pH 5.6 NH<sub>4</sub>AC-HAc -7.5×10<sup>-4</sup>g/ml AMH -0.375μg/ml HAuCl<sub>4</sub>; (b) a+5 ng/ml B; (c) a+40 ng/ml B; (d) a+80 ng/ml B; (e) a+100 ng/ml B; (f) a+150 ng/ml B; (g) a+200 ng/ml B; (h) a+250 ng/ml B; (i) a+300 ng/ml B; (j) a+350 ng/ml B; (k) a+400 ng/ml B; (l) a+450 ng/ml B; (m) a+500 ng/ml B; (n) a+600 ng/ml B.

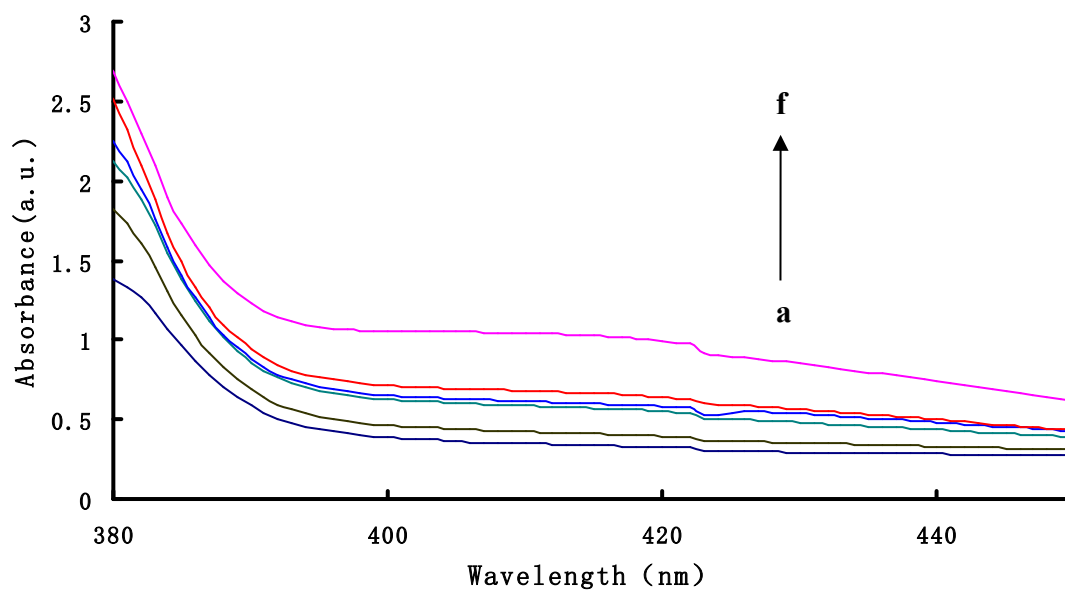

**Figure 4SA Absorption spectra of the B-AMH-AuNP system**

(a) pH 5.6  $\text{NH}_4\text{Ac-HAc}$   $-7.5 \times 10^{-4} \text{g/mL}$  AMH- $0.17 \mu\text{g/mL}$  AuNPs; (b) a+100 ng/mL B; (c) a+200 ng/mL B; (d) a+250 ng/mL B; (e) a+600 ng/mL B; (f) a+650 ng/mL B.

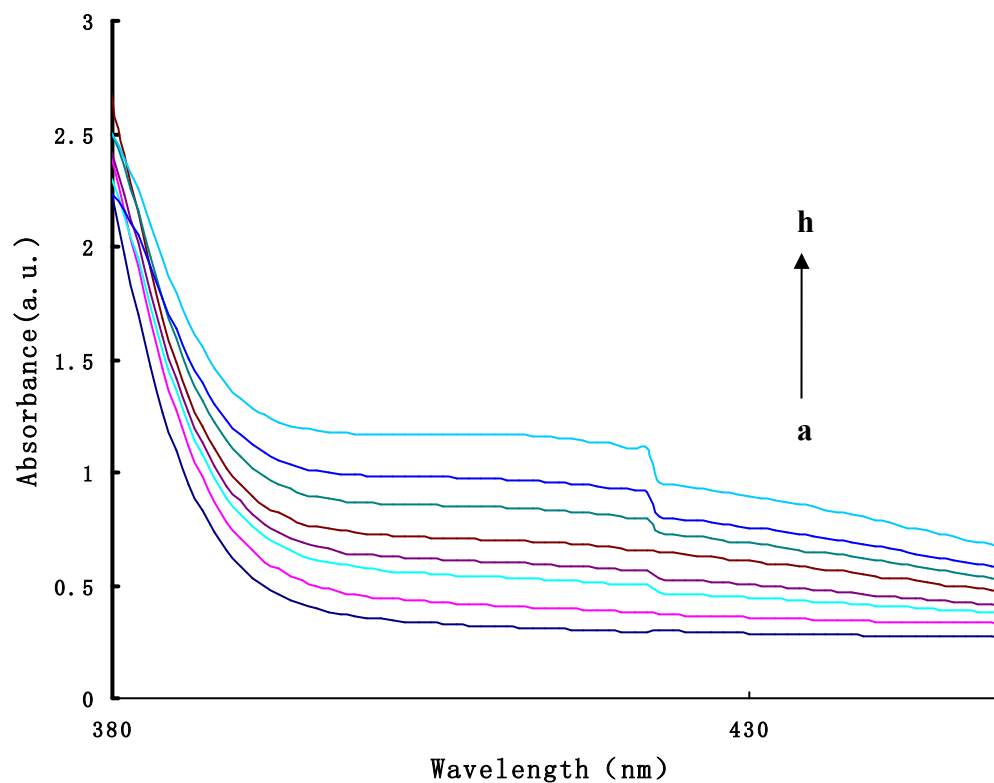

**Figure 4SB Absorption spectra of the B-AMH-  $\text{HAuCl}_4$  system**

(a) pH 5.6  $\text{NH}_4\text{AC-HAc}$   $-7.5 \times 10^{-4} \text{g/mL}$  AMH  $-0.375 \mu\text{g/mL}$   $\text{HAuCl}_4$ ; (b) a+50 ng/mL B; (c) a+75 ng/mL B; (d) a+200 ng/mL B; (e) a+300 ng/mL B; (f) a+400 ng/ml B; (g) a+600 ng/mL B; (h) a+7500 ng/mL B.

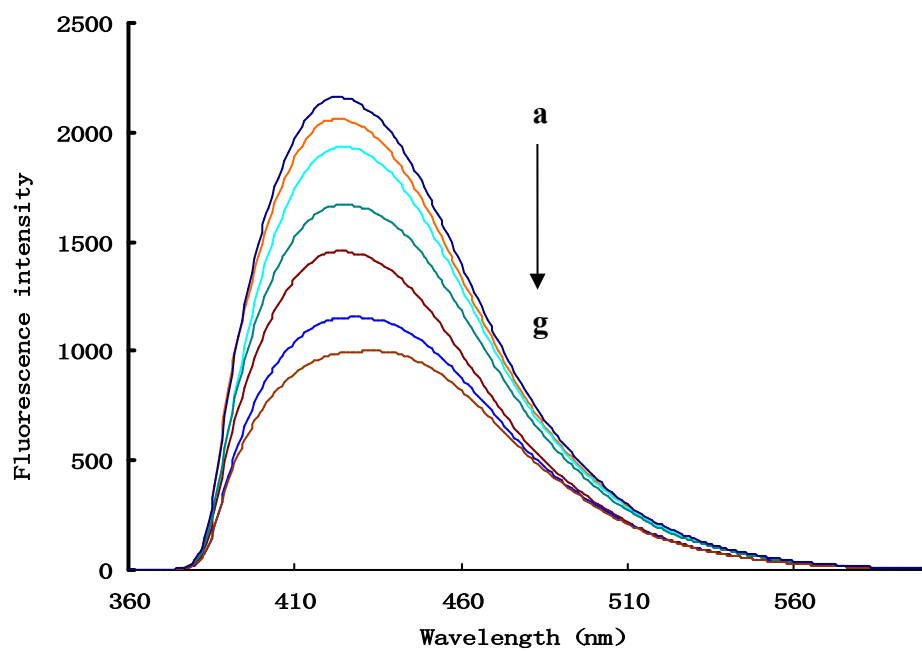

**Figure 5S Fluorescence spectra of the B-AMH system**

(a)  $2.5 \times 10^{-2}$ g/ml pH 5.6  $\text{NH}_4\text{AC-HAc}$  -  $7.5 \times 10^{-4}$ g/ml AMH; (b) a+10 ng/ml B; (c) a+25 ng/ml B; (d) a+100 ng/ml B; (e) a+200 ng/ml B; (f) a+240 ng/ml B; (g) a+300 ng/ml B.

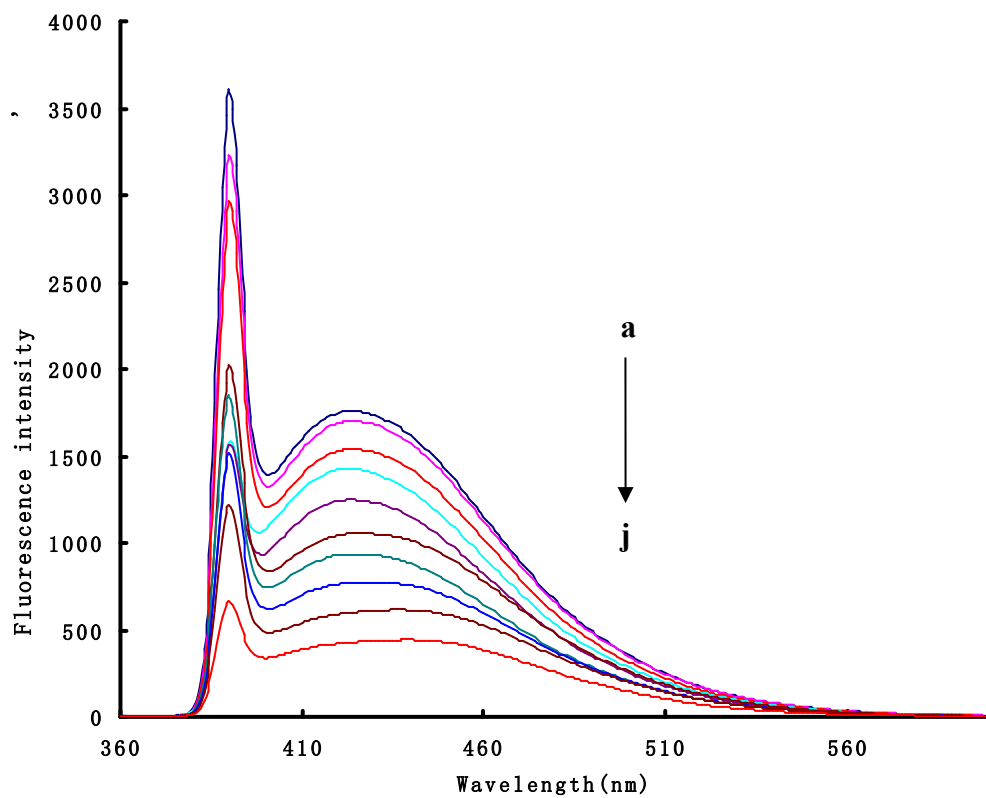

**Figure 6S Fluorescence spectra of the B-AMH-HAuCl<sub>4</sub> system**

(a) 0.375 μg/ml HAuCl<sub>4</sub>-2.5 × 10<sup>-2</sup>g/ml pH 5.6 NH<sub>4</sub>AC-HAc -7.5 × 10<sup>-4</sup>g/ml AMH; (b) a+1 ng/ml B; (c) a+2.5 ng/ml B; (d) a+5 ng/ml B; (e) a+50 ng/ml B; (f) a+100 ng/ml B; (g) a+200 ng/ml B; (h) a+300 ng/ml B; (i) a+400 ng/ml B; (j) a+500 ng/ml B.

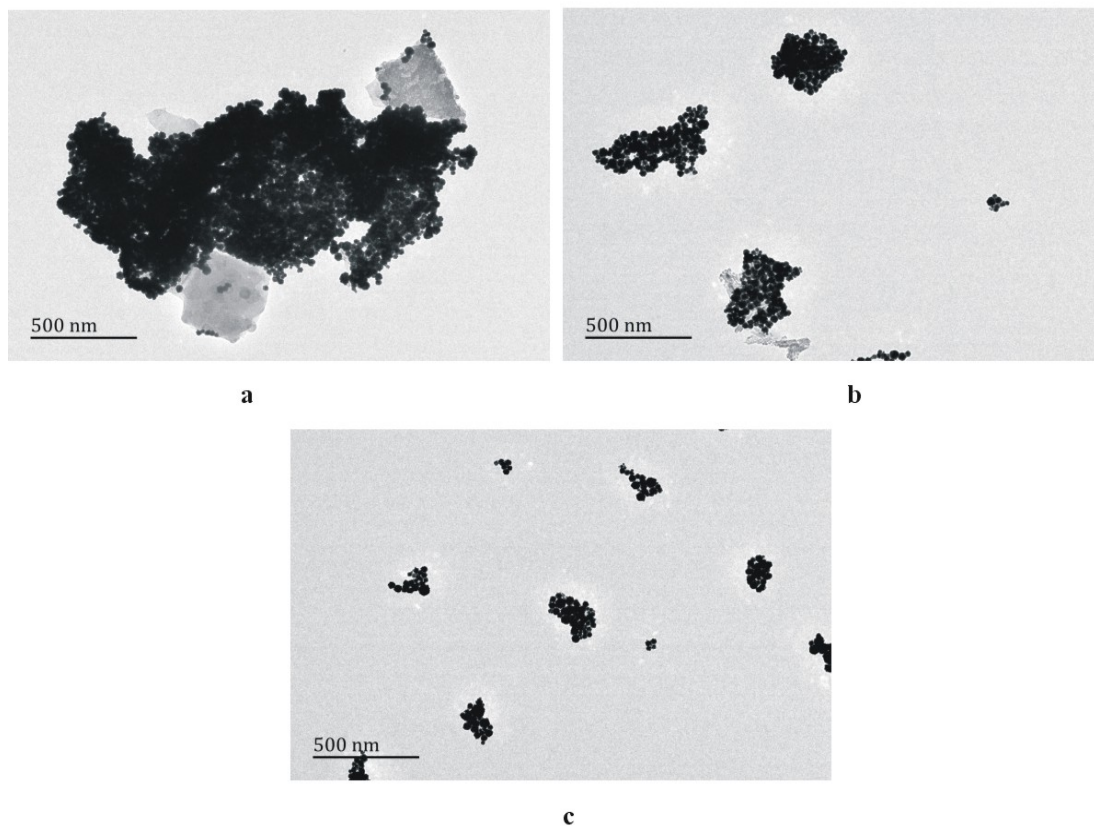

**Figure 7S TEM of the boron-AMH- AuNPs system**

a: pH 5.6 NH<sub>4</sub>AC-HAc -7.5 × 10<sup>-4</sup>g/ml AMH-0.375 μg/ml HAuCl<sub>4</sub>; b: a+250 ng/ml H<sub>3</sub>BO<sub>3</sub>; c: a+500 ng/ml H<sub>3</sub>BO<sub>3</sub>.

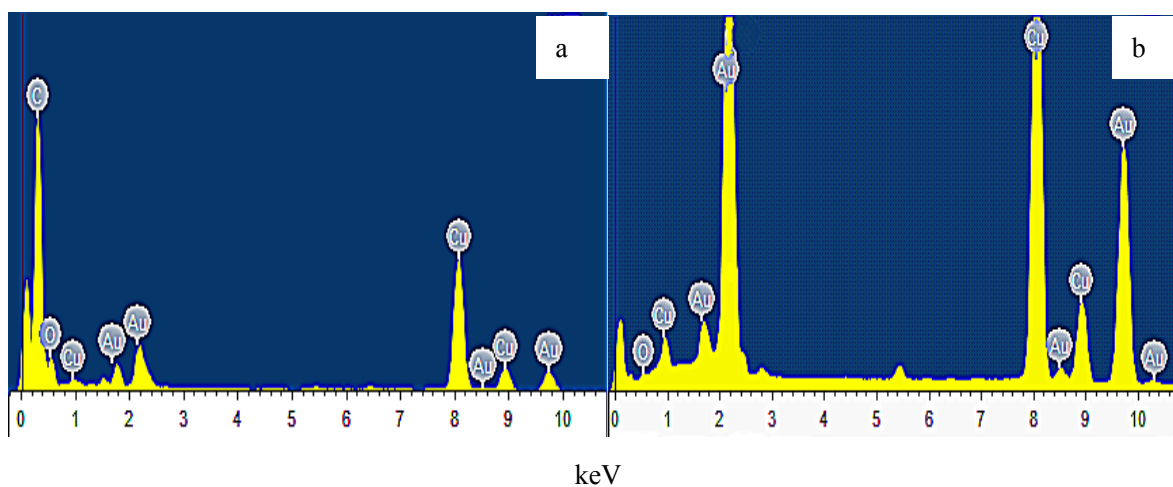

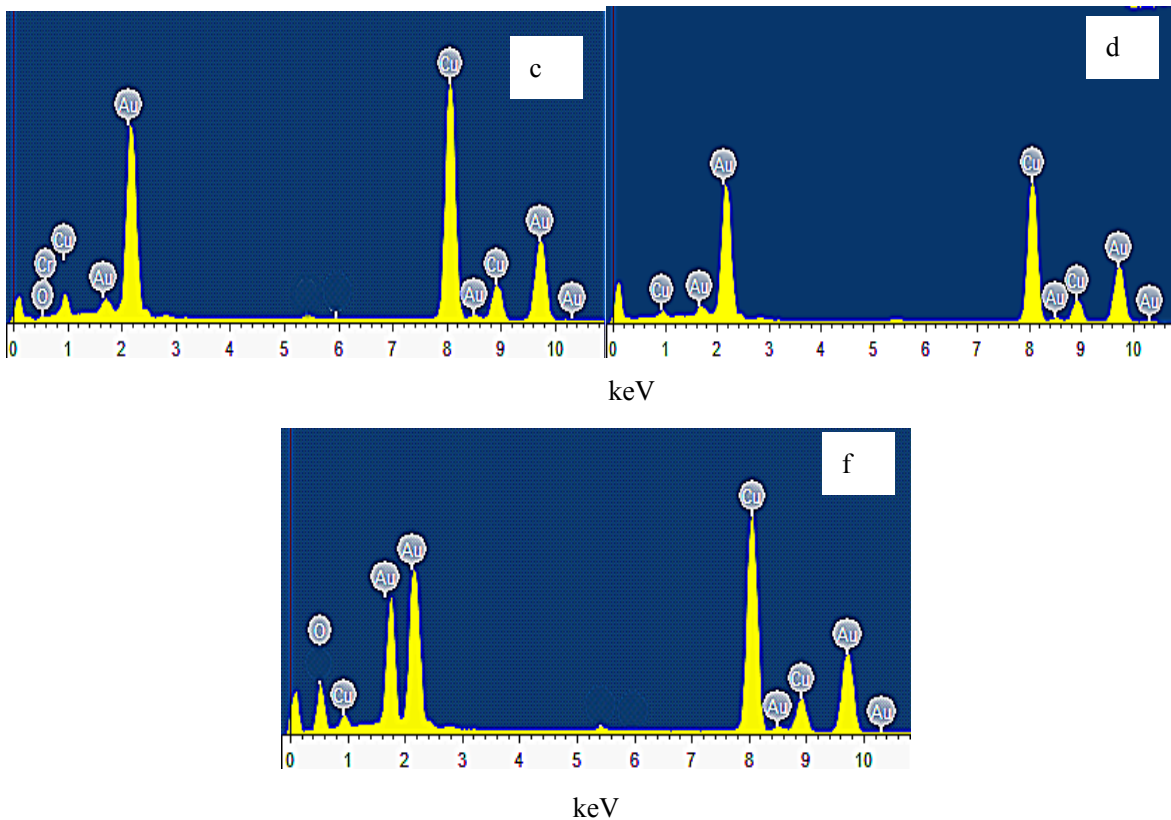

**Figure 8S Energy spectra of the boron-AMH- AuNPs system**

a: 0.17 $\mu$ g/ml AuNPs; b: pH 5.6 NH<sub>4</sub>AC-HAc -7.5 $\times 10^{-4}$ g/ml AMH -0.17 $\mu$ g/ml AuNPs; c: b+500ng/ml B;  
 d: pH 5.6 NH<sub>4</sub>AC-HAc-7.5 $\times 10^{-4}$ g/ml AMH -0.375 $\mu$ g/ml HAuCl<sub>4</sub>; e: d+500ng/ml B.

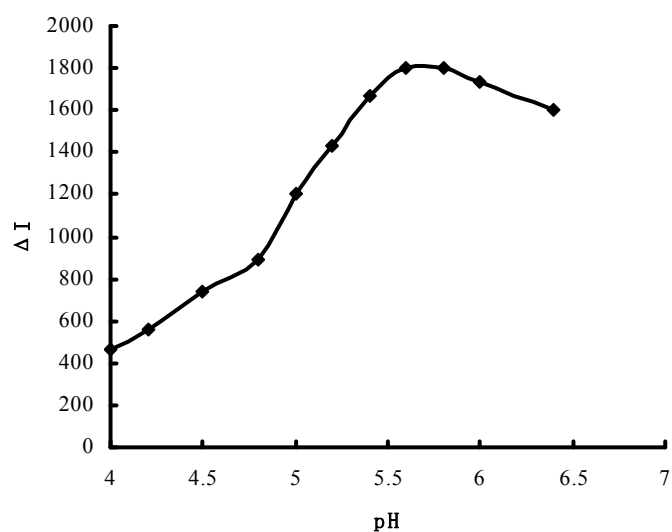

**Figure 9S Effect of pH of buffer solution**

200 ng/ml B -2.5 $\times 10^{-2}$ g/ml NH<sub>4</sub>AC-HAc -7.5 $\times 10^{-4}$ g/ml AMH -0.17 $\mu$ g/ml AuNPs

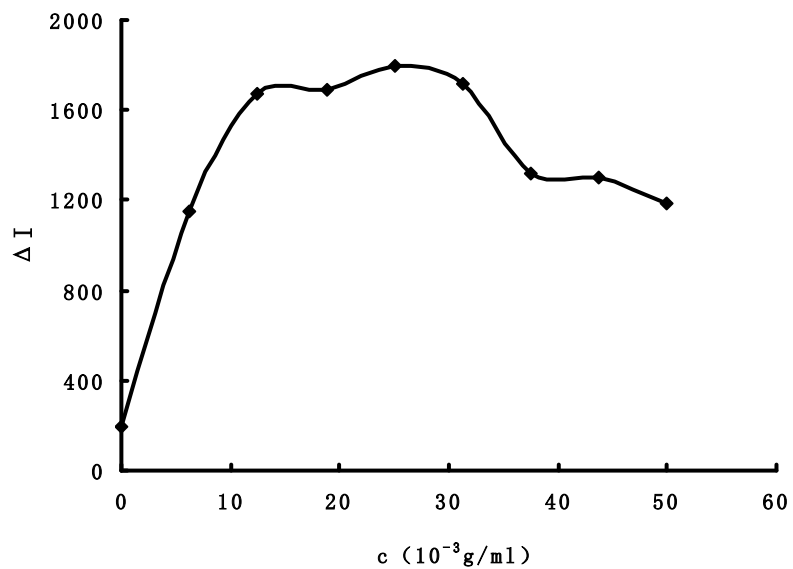

**Figure 10S Effect of concentration of buffer solution**

200 ng/ml B-pH 5.6 NH<sub>4</sub>AC-HAc -7.5×10<sup>-4</sup>g/ml AMH -0.17μg/ml AuNPs

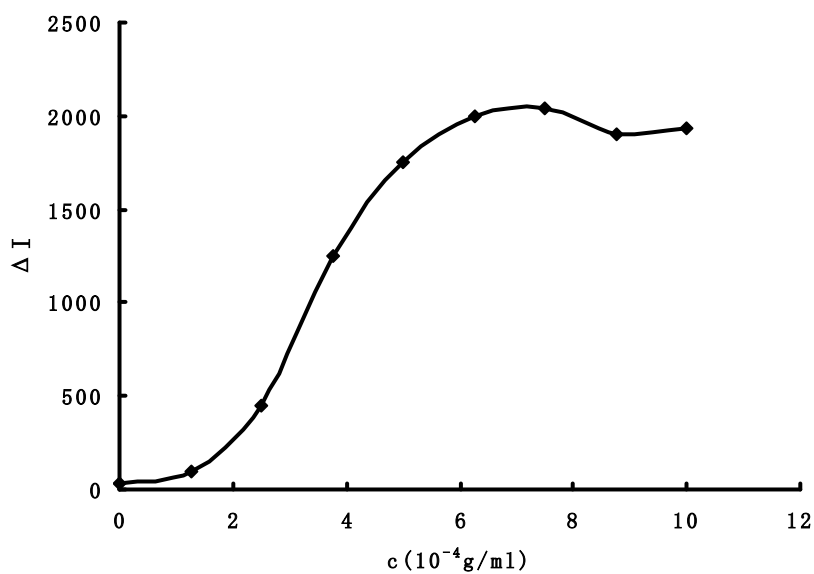

**Figure 11S Effect of AMH concentration**

200 ng/ml B -2.5×10<sup>-2</sup>g/ml pH 5.6 NH<sub>4</sub>AC-HAc - AMH -0.17μg/ml AuNPs;

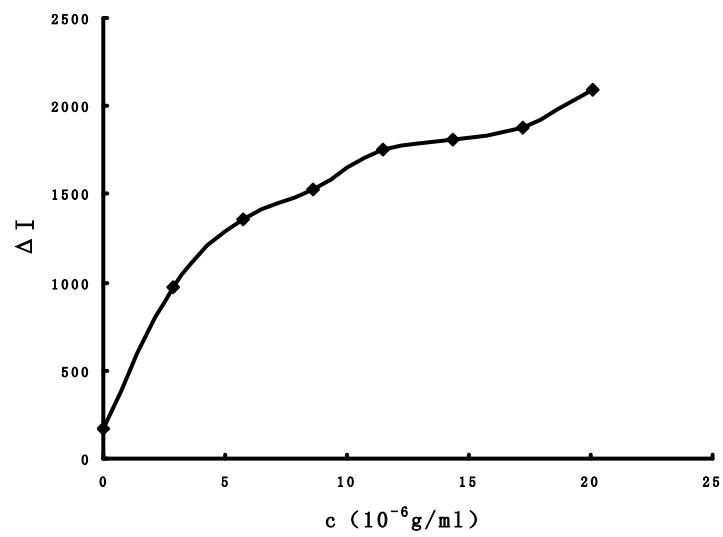

**Figure 12S Effect of AuNPs- concentration**  
 200 ng/mlB-pH 5.6 NH<sub>4</sub>AC-HAc -7.5×10<sup>-4</sup>g/ml AMH - AuNPs

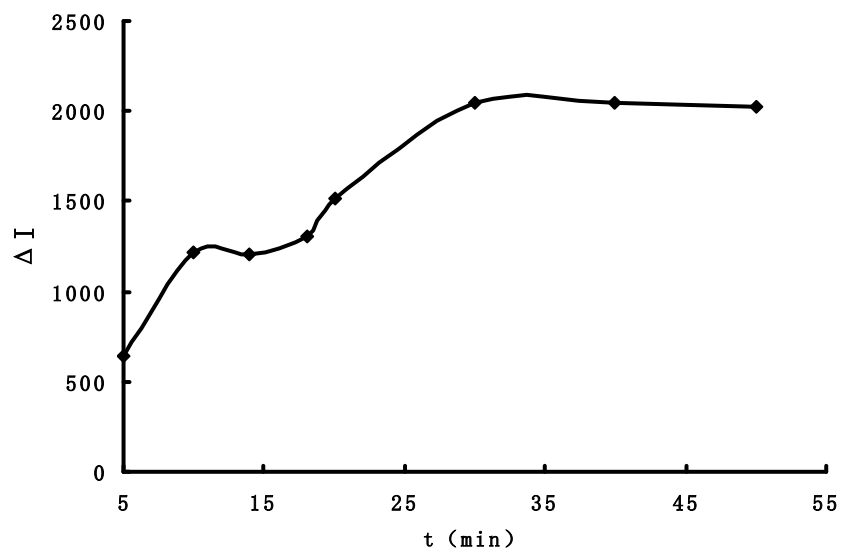

**Figure 13S Effect of AMH and boron reaction time**  
 200 ng/mlB -pH 5.6 NH<sub>4</sub>AC-HAc -7.5×10<sup>-4</sup>g/ml AMH -0.17μg/ml AuNPs



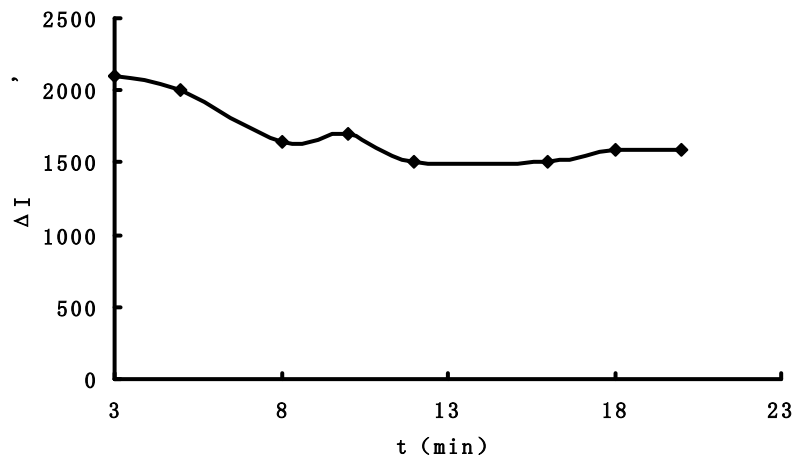

**Figure 14S Effect of the time complexes react with AuNPs**  
 200 ng/mlB -pH 5.6 NH<sub>4</sub>AC-HAc -7.5×10<sup>-4</sup>g/ml AMH -0.17μg/ml AuNPs

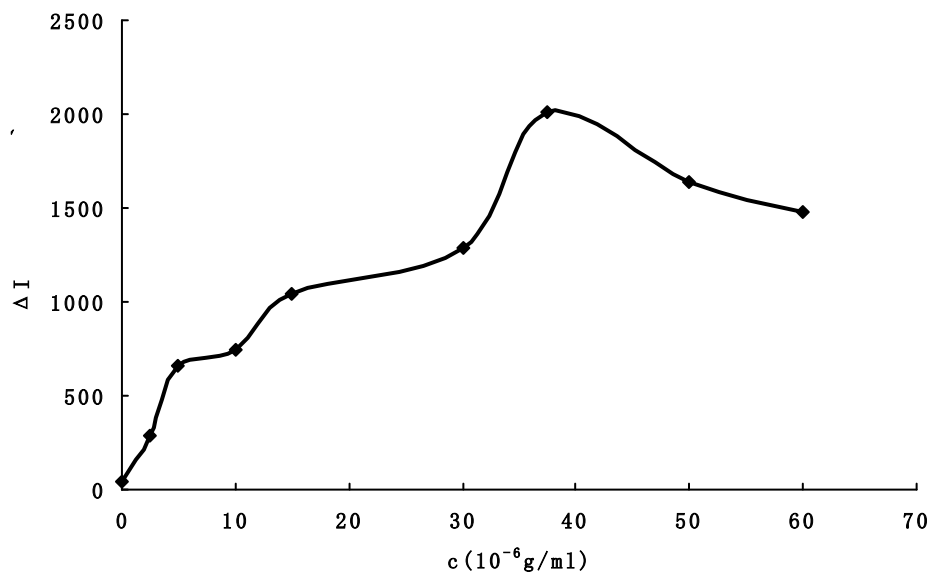

**Figure 15S Effect of HAuCl<sub>4</sub> concentration**  
 200 ng/mlB - pH 5.6 NH<sub>4</sub>AC-HAc -7.5×10<sup>-4</sup>g/ml AMH

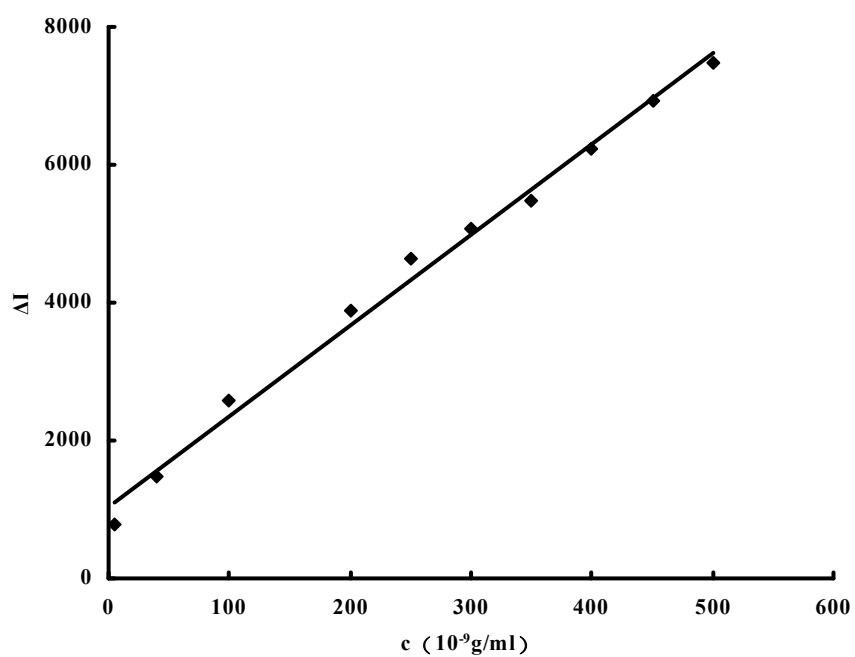

Fig. 16S Working curve of the boron-AMH- AuNPs Rayleigh scattering system  
 pH 5.6 NH<sub>4</sub>AC-HAc -7.5×10<sup>-4</sup>g/ml AMH -0.375μg/mL HAuCl<sub>4</sub>

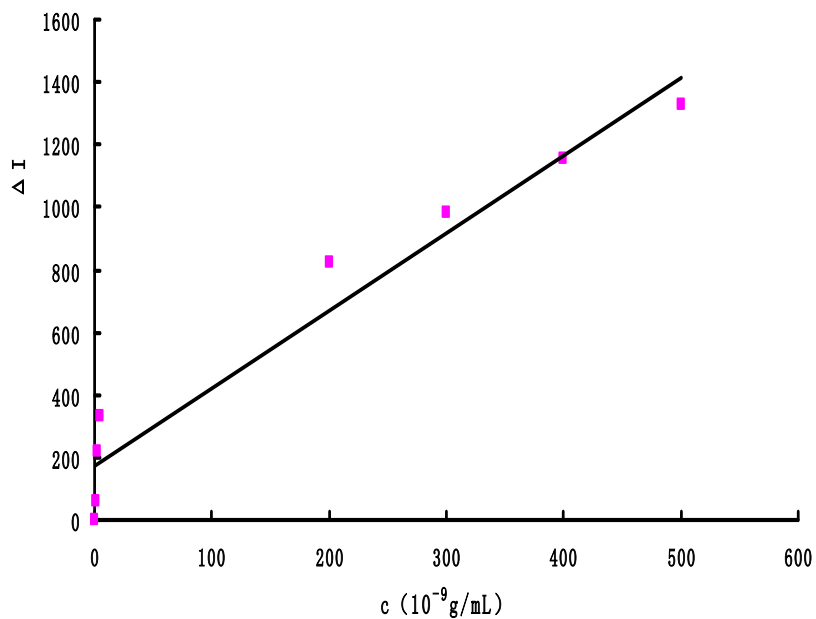

Fig. 17S curve of AMH- AuNPs-boron fluorescence system  
 pH 5.6 NH<sub>4</sub>AC-HAc -7.5×10<sup>-4</sup>g/ml AMH -0.375μg/ml HAuCl<sub>4</sub>.

**Table 1S Comparison of different analytical methods for B**

| Method                   | Principle                                                                                                                                                              | Linear range                    | Detection limit           | Comments                                                                                                                  | Ref. |
|--------------------------|------------------------------------------------------------------------------------------------------------------------------------------------------------------------|---------------------------------|---------------------------|---------------------------------------------------------------------------------------------------------------------------|------|
| Fluorescence method      | Base on the borate ion and alizarin red S using flow injection analysis of aqueous phase reaction                                                                      | 4 -40 $\mu\text{gml}^{-1}$      | 0.34 $\mu\text{gml}^{-1}$ | Stability, suitable for the determination of ultra trace boron in environmental water samples, but the sensitivity is low | 11   |
| Quartz crystal resonator | Polymers with boron complexes, polymer film deposited on quartz crystal, the oscillation frequency is directly proportional to the change the concentration of boron . | 0.3-80 $\mu\text{mol/L}$        | 0.3 $\mu\text{mol/L}$     | complicated operation                                                                                                     | 44   |
| Ion chromatography       | Tetrafluoroborate ions change to boron                                                                                                                                 | 0.0667–1.0 M                    | ----                      | Simple, stable. But the sensitivity was very low                                                                          | 29   |
| voltammetry              | Boron complexes with alizarin red S (ARS) complexes and the free ligands, adsorbed on the hanging mercury drop electrode                                               | 0–500 $\mu\text{g L}^{-1}$      | 15 $\mu\text{g L}^{-1}$   | Stability, good selectivity, simple                                                                                       | 12   |
| ET-AAS                   | Determination of boron in shrimp by electrothermal atomic absorption spectrometry digestion and matrix (flux) separation approach for the                              | -                               | -                         | Stability, good selectivity, and applied to real life                                                                     | 9    |
| ICP-AES                  | determination of boron in high-purity graphite powder using ICP-OES.                                                                                                   | -                               | 90 ng g <sup>-1</sup>     | The content of boron in graphite powder can be detected in less than 1 ppm level                                          | 45   |
| Spectrophotometry        | In alkaline solution, lysine with and 1,2 - naphthoquinone                                                                                                             | 2.16–43.24 $\mu\text{gmL}^{-1}$ | 2 $\mu\text{gmL}^{-1}$    | Fast, low cost, but the sensitivity is low                                                                                | 6    |

---

|                     |                                                                                                                                                                                                                                                                                           |              |   |                                                                       |            |
|---------------------|-------------------------------------------------------------------------------------------------------------------------------------------------------------------------------------------------------------------------------------------------------------------------------------------|--------------|---|-----------------------------------------------------------------------|------------|
| HPLC                | <p>sulfonic acid and the -4- reaction of boron, charge transfer occurs</p> <p>Boron, at sub-ppm levels, in U<sub>3</sub>O<sub>8</sub> powder and aluminum metal, was determined using complex formation and dynamically modified reversedphase high-performance liquid chromatography</p> | 0.02-0.5µg   | - | Simple, expensive instrument                                          | 47         |
| SRET                | <p>Rayleigh scattering resonance energy of nanogold transfer to the complex form by boric acid and AMH</p>                                                                                                                                                                                | 5-1000ng/mL  |   | The method is simple, rapid, high sensitivity, stability, selectivity | This assay |
| SRET                | <p>The Rayleigh scattering resonance energy of HAuCl<sub>4</sub> transfer to the complex form by boric acid and AMH</p>                                                                                                                                                                   | 5-600ng/mL   |   | The method is simple, rapid, high sensitivity, stability, selectivity | This assay |
| Fluorescence method | <p>AMH with fluorescence, and after react with boric acid fluorescence quenching, gold nanoparticles can enhance the fluorescence quenching efficiency</p>                                                                                                                                | 9-1000 ng/mL |   | The method is simple, rapid, high sensitivity                         | This assay |
| Fluorescence method | <p>AMH with fluorescence, and after react with boric acid fluorescence quenching, HAuCl<sub>4</sub> can enhance the fluorescence quenching efficiency</p>                                                                                                                                 | 9-500 ng/mL  |   | The method is simple, rapid, high sensitivity                         | This assay |

---

**Table 2S Accuracy of the different boron systems**

| System                 | B concentration<br>(ng/mL) | I                            | Average | RSD<br>(%) |
|------------------------|----------------------------|------------------------------|---------|------------|
| AMH-AuNPs              | 150                        | 4293, 4087, 4155, 4400, 4044 | 4196    | 3.5        |
|                        | 180                        | 3254, 3043, 3200, 3058, 3124 | 3156    | 2.9        |
| AMH-HAuCl <sub>4</sub> | 200                        | 5623, 5824, 5577, 5702, 5500 | 5645    | 2.2        |
|                        | 500                        | 3255, 2977, 2999, 3052, 3122 | 3081    | 3.6        |

**Table 3S Effect of foreign substances**

| Coexistent substances | Tolerance<br>( $\mu\text{mol/L}$ ) | Relative error(%) | Coexistent substances          | Tolerance<br>( $\mu\text{mol/L}$ ) | Relative error(%) |
|-----------------------|------------------------------------|-------------------|--------------------------------|------------------------------------|-------------------|
| Mn <sup>2+</sup>      | 400                                | 0.36              | F <sup>-</sup>                 | 400                                | -6.9              |
| Cd <sup>2+</sup>      | 400                                | 5.1               | IO <sub>3</sub> <sup>-</sup>   | 400                                | -8.7              |
| Zn <sup>2+</sup>      | 400                                | -1.14             | SO <sub>4</sub> <sup>2-</sup>  | 400                                | 0.5               |
| Na <sup>+</sup>       | 400                                | 0.2               | NO <sub>3</sub> <sup>-</sup>   | 400                                | 5.8               |
| Glucose               | 400                                | -7.5              | ClO <sub>4</sub> <sup>-</sup>  | 400                                | 2.1               |
| Hg <sup>2+</sup>      | 400                                | -3.9              | Bi <sup>3+</sup>               | 400                                | -0.3              |
| Al <sup>3+</sup>      | 400                                | 0.4               | SiO <sub>3</sub> <sup>2-</sup> | 400                                | -4.6              |
| Mannitol              | 400                                | 6.7               | H <sub>2</sub> O <sub>2</sub>  | 400                                | -6.7              |
| Glycerol              | 400                                | 4.6               | Glycol                         | 400                                | -3.8              |
| Salicylic acid        | 200                                | 6.9               | Mandelic acid                  | 400                                | 4.1               |
| L-tyrosine            | 40                                 | 4.4               | L-glutamic acid                | 200                                | -0.1              |

Table 4S Results for the determination of boron in water samples (n=5)

| Sample   | Single value<br>(ng/mL) | Average<br>(ng/mL) | B content<br>(ng/mL) | Spiked<br>B (ng/m<br>L) | Found B<br>(ng/mL) | Recovery<br>(%) | RSD<br>(%) |
|----------|-------------------------|--------------------|----------------------|-------------------------|--------------------|-----------------|------------|
| Sample 1 | 81.1, 85.3,             | 84.9               | 420                  | 150                     | 229.1              | 97.57           | 2.4        |
|          | 90.6, 75.7, 92.0        |                    |                      | 200                     | 324.1              | 96.8            | 2.7        |
| Sample 2 | 58.7, 60.8,             | 59.0               | 300                  | 150                     | 199.8              | 95.6            | 1.7        |
|          | 57.6, 44.3, 73.8        |                    |                      | 200                     | 304.2              | 98.8            | 3.0        |
| Sample 3 | 108.4, 103.3,           | 105.1              | 530                  | 200                     | 328.3              | 102.6           | 1.6        |
|          | 92.0, 107.3, 114.4      |                    |                      | 400                     | 461.7              | 99.7            | 4.1        |
| Sample 4 | 23.7, 27.6,             | 24.9               | 120                  | 200                     | 301.4              | 109.6           | 2.6        |
|          | 22.2, 23.8, 27.3        |                    |                      | 400                     | 445.6              | 104.9           | 3.4        |
| Sample 5 | 30.5, 23.1,             | 29.3               | 150                  | 200                     | 300.7              | 107.6           | 2.7        |
|          | 30.4, 30.5, 31.8        |                    |                      | 400                     | 446.3              | 103.9           | 4.1        |
| Sample 6 | 56.4, 62.9,             | 57.9               | 290                  | 200                     | 310.7              | 100.9           | 3.7        |
|          | 73.1, 47.1, 50.0        |                    |                      | 400                     | 448.5              | 97.9            | 2.3        |
